# Supplementary material
Source: publisher figshare collection journal article supplement (https://sage.figshare.com/ndownloader/files/16118063)
Supplement: Supplementary file 1 [file 16118063]

## Supplementary data

### New Unsaturated Lactones and a Meroterpenoid from *Ganoderma lucidum*

Qi-Hang Xin<sup>1\*</sup>, Qi Luo<sup>2\*</sup>, Ze-Hong Wu<sup>1</sup>, Jiao-Jiao Zhang<sup>1</sup>, Li-Zhong Liu<sup>1</sup>, and Yong-Xian Cheng<sup>1</sup>

<sup>a</sup> School of Basic Medicine, School of Pharmaceutical Sciences, Shenzhen University Health Science Center, Shenzhen 518060, China

<sup>b</sup> State Key Laboratory of Phytochemistry and Plant Resources in West China, Kunming Institute of Botany, Chinese Academy of Sciences, Kunming 650201, China

<sup>1</sup>These authors contributed equally to this paper.

yxcheng@szu.edu.cn; liulz@szu.edu.cn

## Contents

### 1. Optical value calculations of compound **1**

### 2. Supplementary Figures

Figure S2. HRESIMS spectrum of **1**

Figure S3.  $^1\text{H}$  NMR spectrum of **1** in methanol- $d_4$

Figure S4.  $^{13}\text{C}$  NMR and DEPT spectra of **1** in methanol- $d_4$

Figure S5.  $^1\text{H}$ - $^1\text{H}$  COSY spectrum of **1** in methanol- $d_4$

Figure S6. HSQC spectrum of **1** in methanol- $d_4$

Figure S7. HMBC spectrum of **1** in methanol- $d_4$

Figure S8. HRESIMS of **2**

Figure S9.  $^1\text{H}$  NMR spectrum of **2** in methanol- $d_4$

Figure S10.  $^{13}\text{C}$  NMR spectrum of **2** in methanol- $d_4$

Figure S11.  $^1\text{H}$ - $^1\text{H}$  COSY spectrum of **2** in methanol- $d_4$

Figure S12. HSQC spectrum of **2** in methanol- $d_4$

Figure S13. HMBC spectrum of **2** in methanol- $d_4$

Figure S14. HRESIMS of **3**

Figure S15.  $^1\text{H}$  NMR spectrum of **3** in methanol- $d_4$

Figure S16.  $^{13}\text{C}$  NMR spectrum of **3** in methanol- $d_4$

Figure S17.  $^1\text{H}$ - $^1\text{H}$  COSY spectrum of **3** in methanol- $d_4$

Figure S18. HSQC spectrum of **3** in methanol- $d_4$

Figure S19. HMBC spectrum of **3** in methanol- $d_4$

Figure S20. ROESY spectrum of **3** in methanol- $d_4$

Figure S21. CD spectrum of **3** in methanol

## 1. Optical value calculations of leucocontextum C

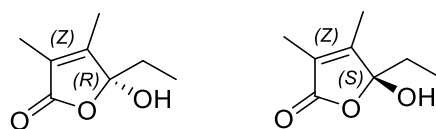

Model compounds

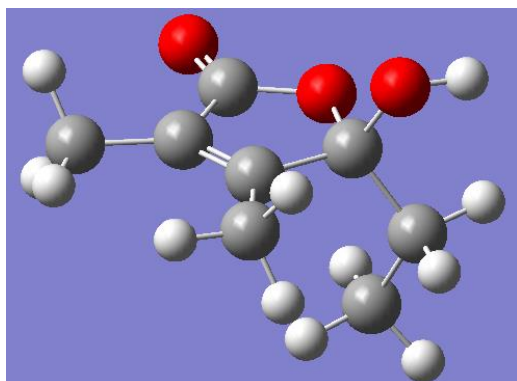

**4R**

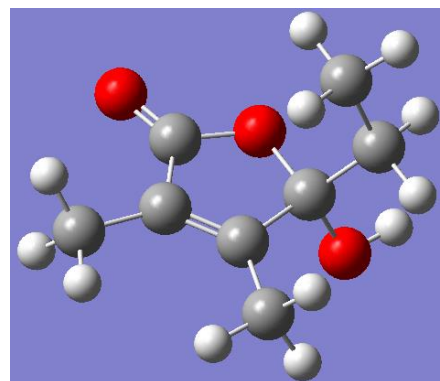

**4S**

**Figure S1.** Optimized geometries of predominant conformers for model compounds at the B3LYP/6-311G (d, p) level in MeOH.

**Table S1.** Important thermodynamic parameters (a.u.) at B3LYP/6-311G (d, p) level in MeOH.

| conformer | E+ZPE       | G           | [Alpha] (5893.0 Å) |
|-----------|-------------|-------------|--------------------|
| <b>4R</b> | −537.735128 | −537.772566 | −54.0              |
| <b>4S</b> | −537.735128 | −537.772566 | +54.0              |

E+ZPE, G: total energy with zero point energy (ZPE) and Gibbs free energy at 298.15 K.

## 2. Supplementary Figures

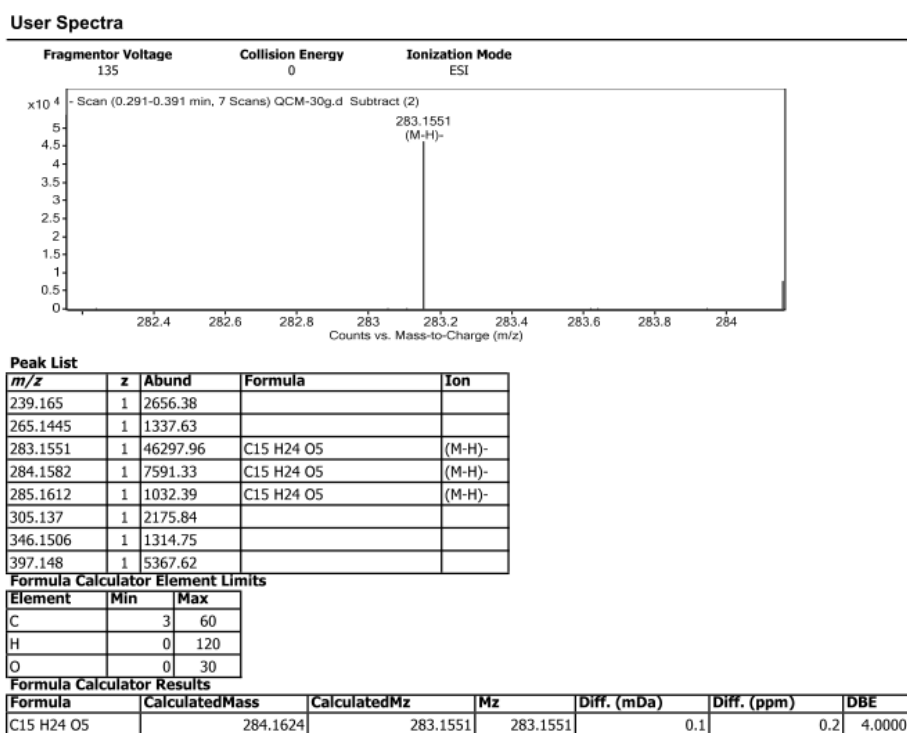

Figure S2. HRESIMS of **1**

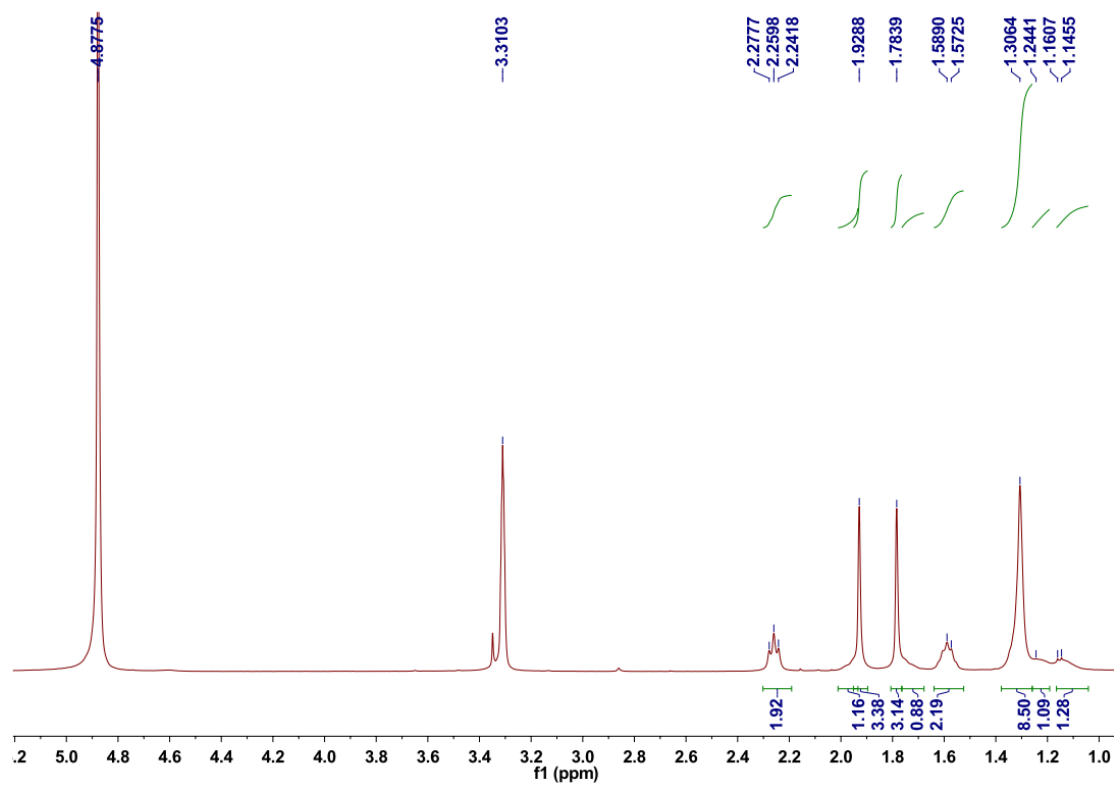

Figure S3. <sup>1</sup>H NMR spectrum of **1** in methanol-*d*<sub>4</sub>

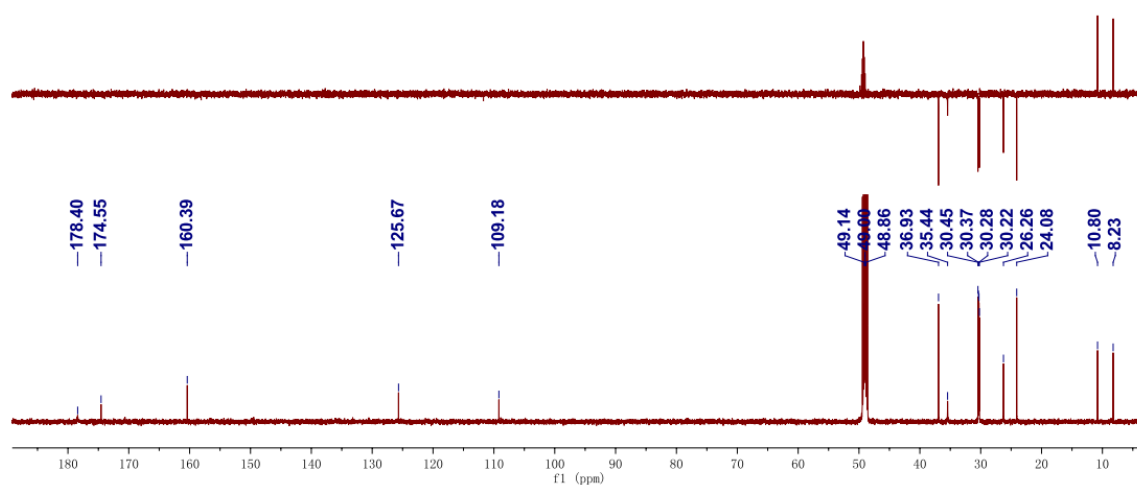

Figure S4.  $^{13}\text{C}$  NMR and DEPT spectra of **1** in methanol- $d_4$

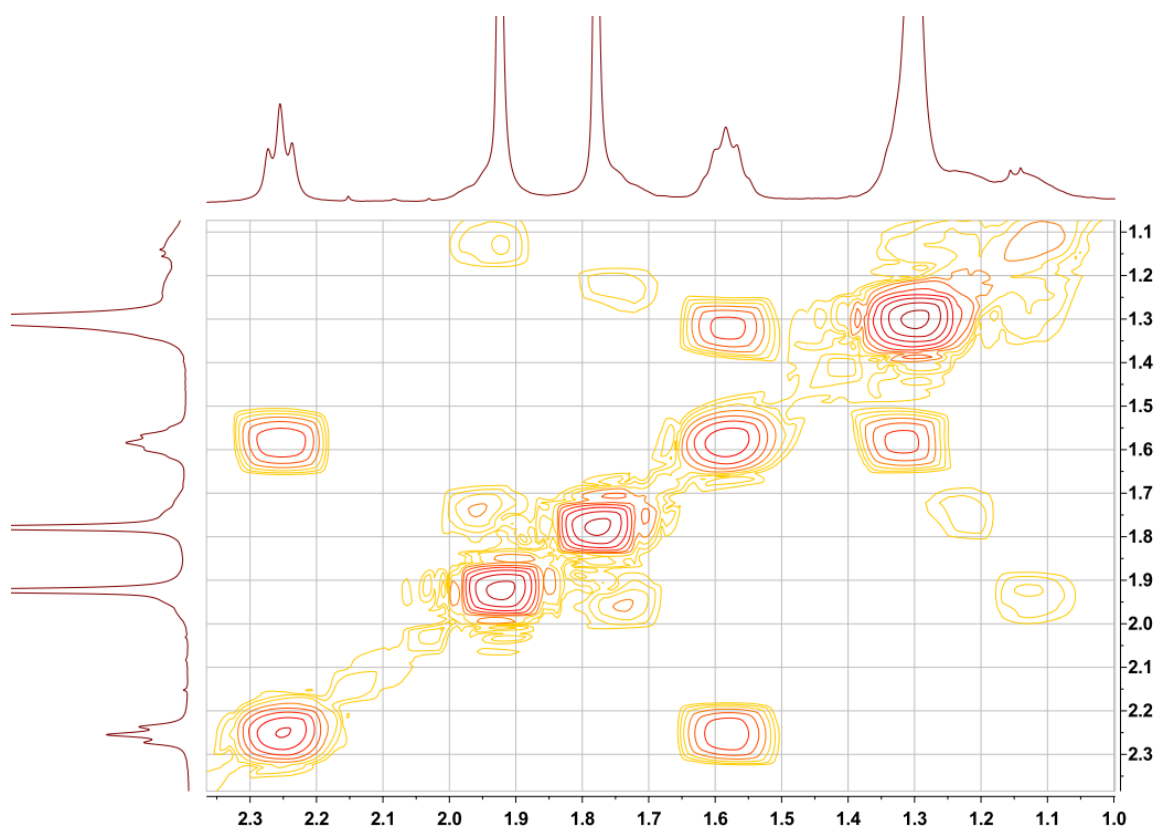

Figure S5.  $^1\text{H}$ - $^1\text{H}$  COSY spectrum of **1** in methanol- $d_4$

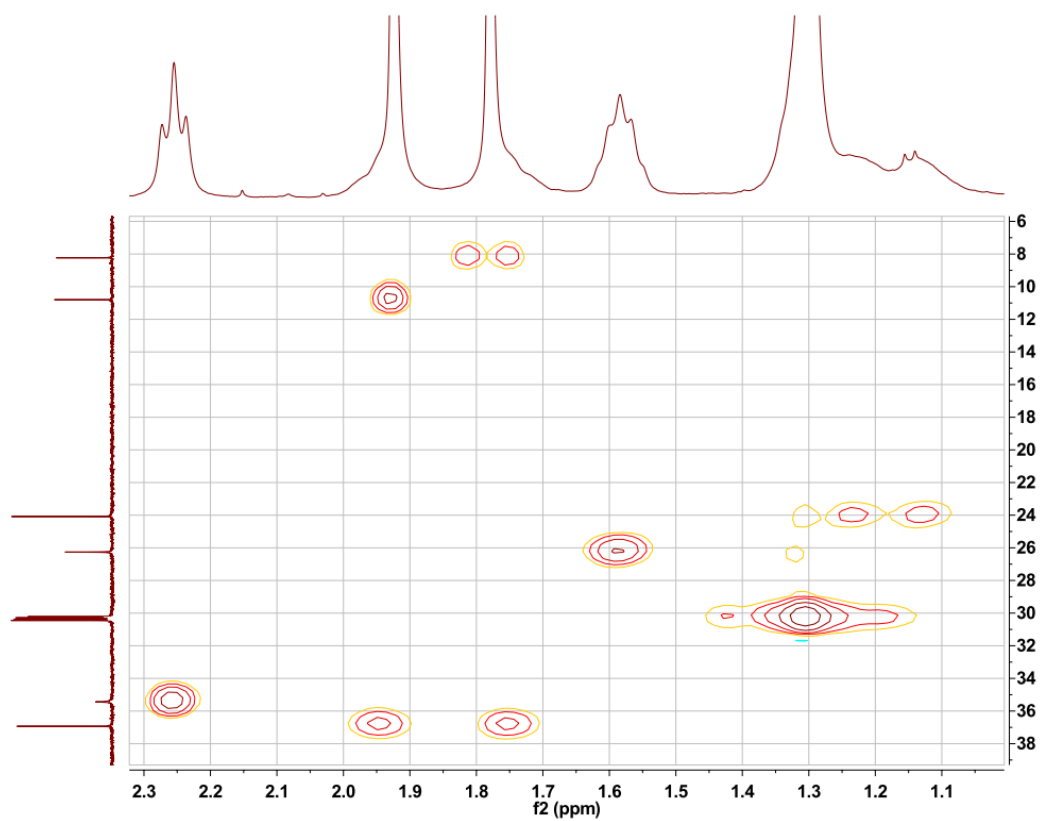

Figure S6. HSQC spectrum of **1** in methanol-*d*<sub>4</sub>

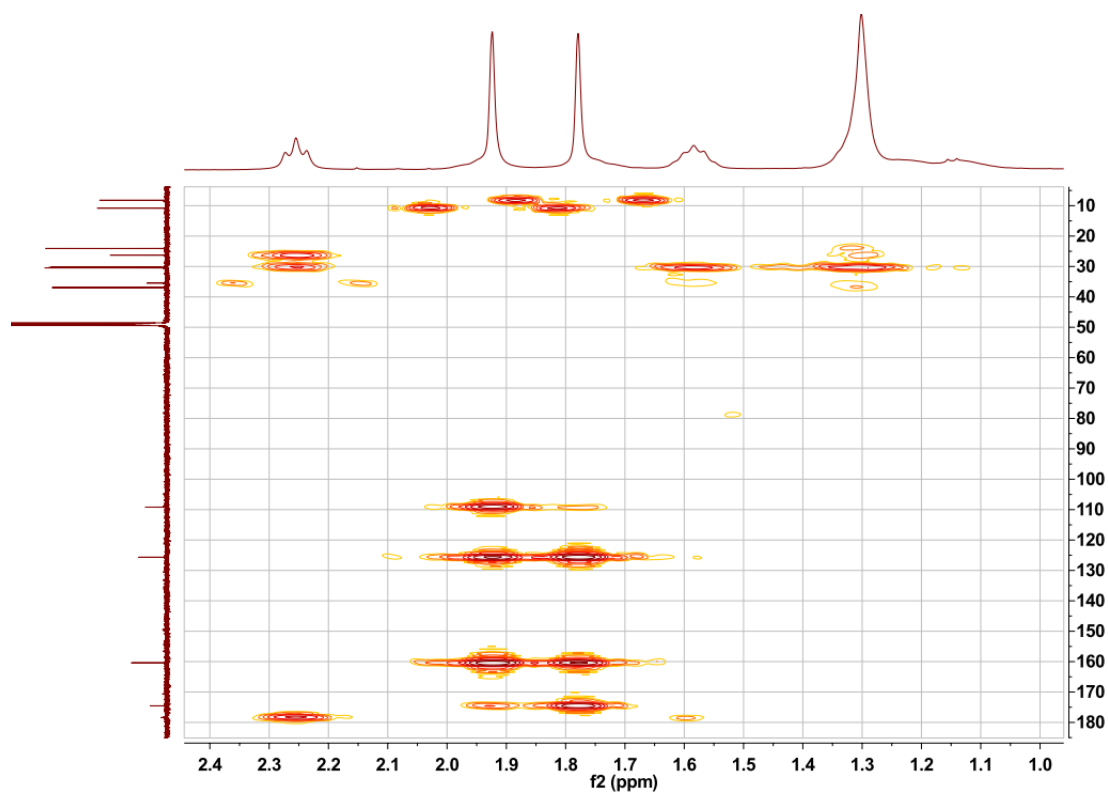

Figure S7. HMBC spectrum of **1** in methanol-*d*<sub>4</sub>

# User Spectra

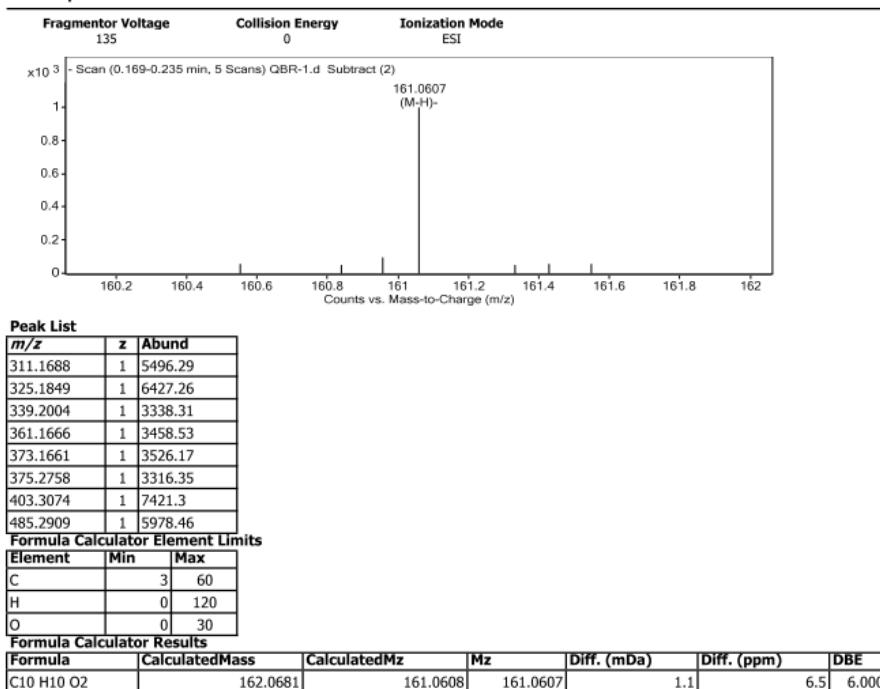

Figure S8. HRESIMS of **2**

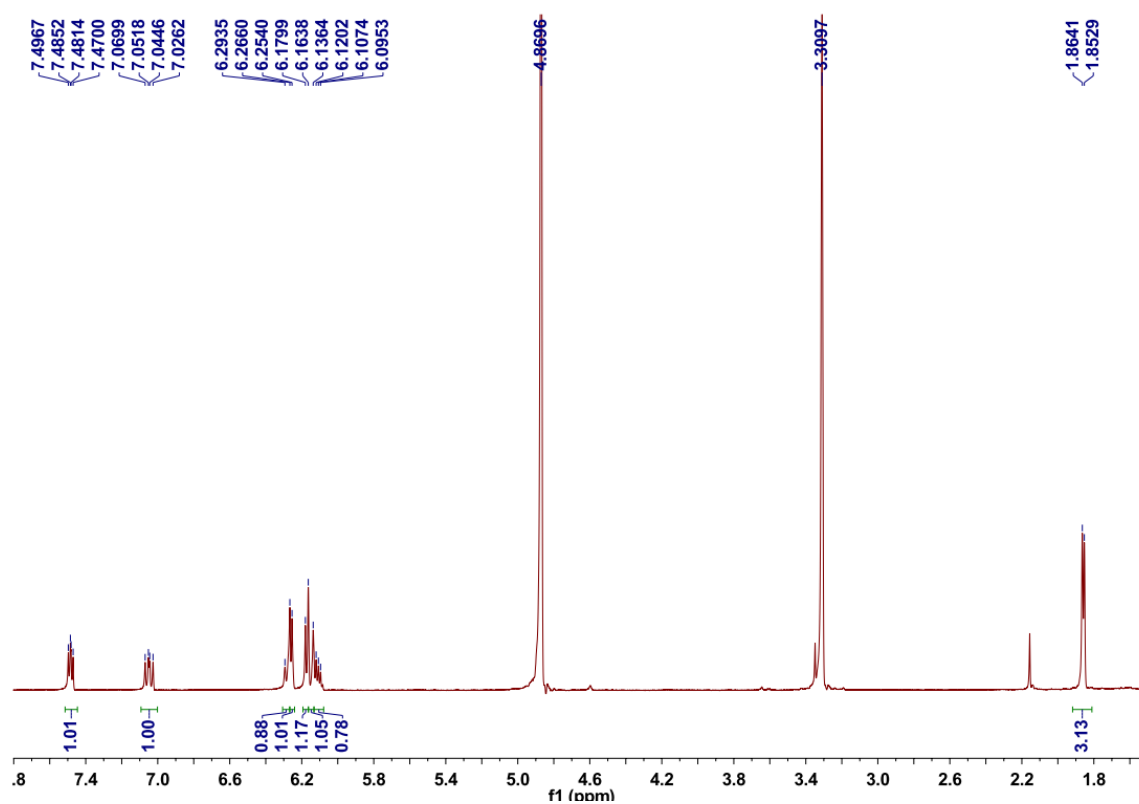

Figure S9. <sup>1</sup>H NMR spectrum of **2** in methanol-*d*<sub>4</sub>

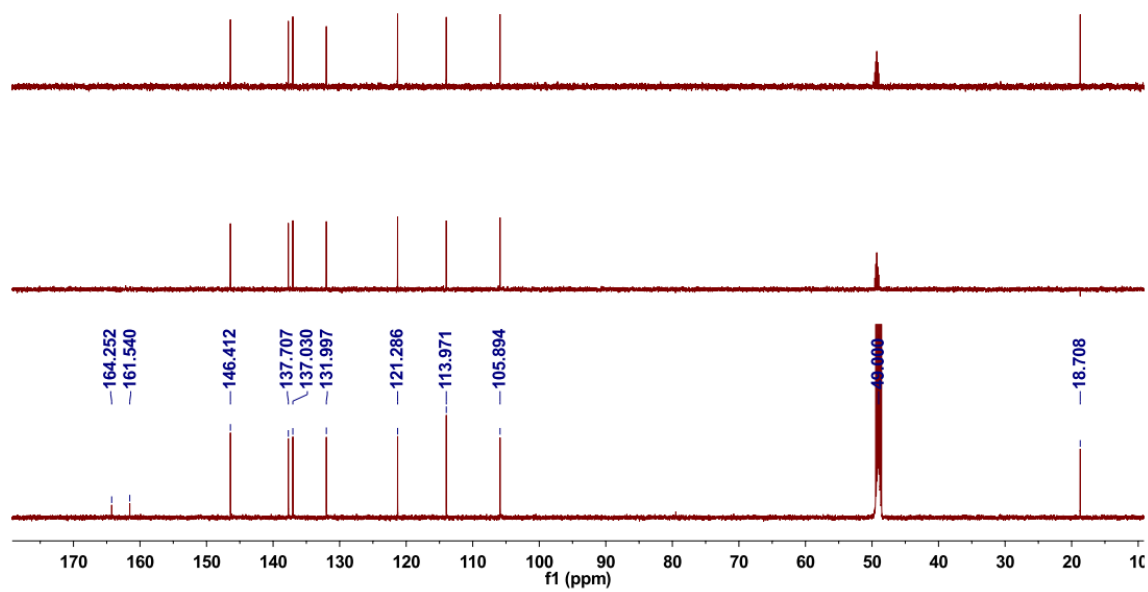

Figure S10.  $^{13}\text{C}$  NMR spectrum of **2** in methanol- $d_4$

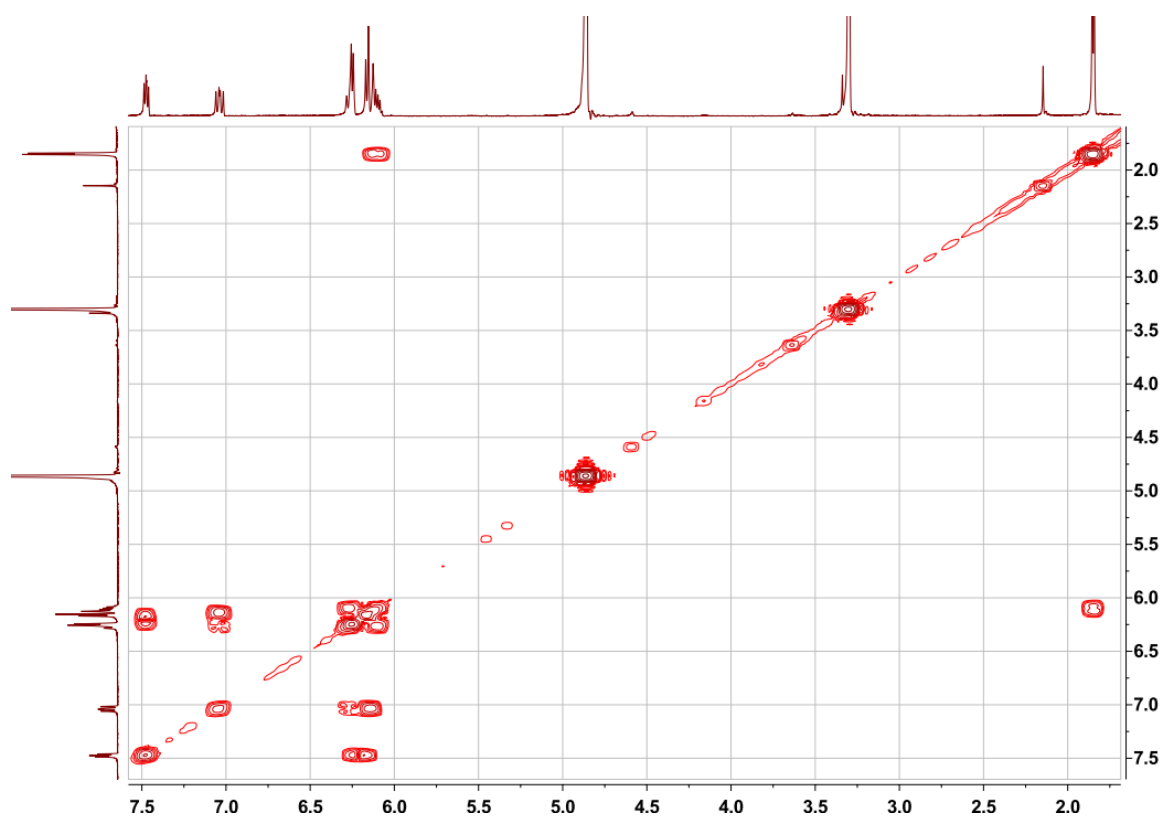

Figure S11.  $^1\text{H}$ - $^1\text{H}$  COSY spectrum of **2** in methanol- $d_4$



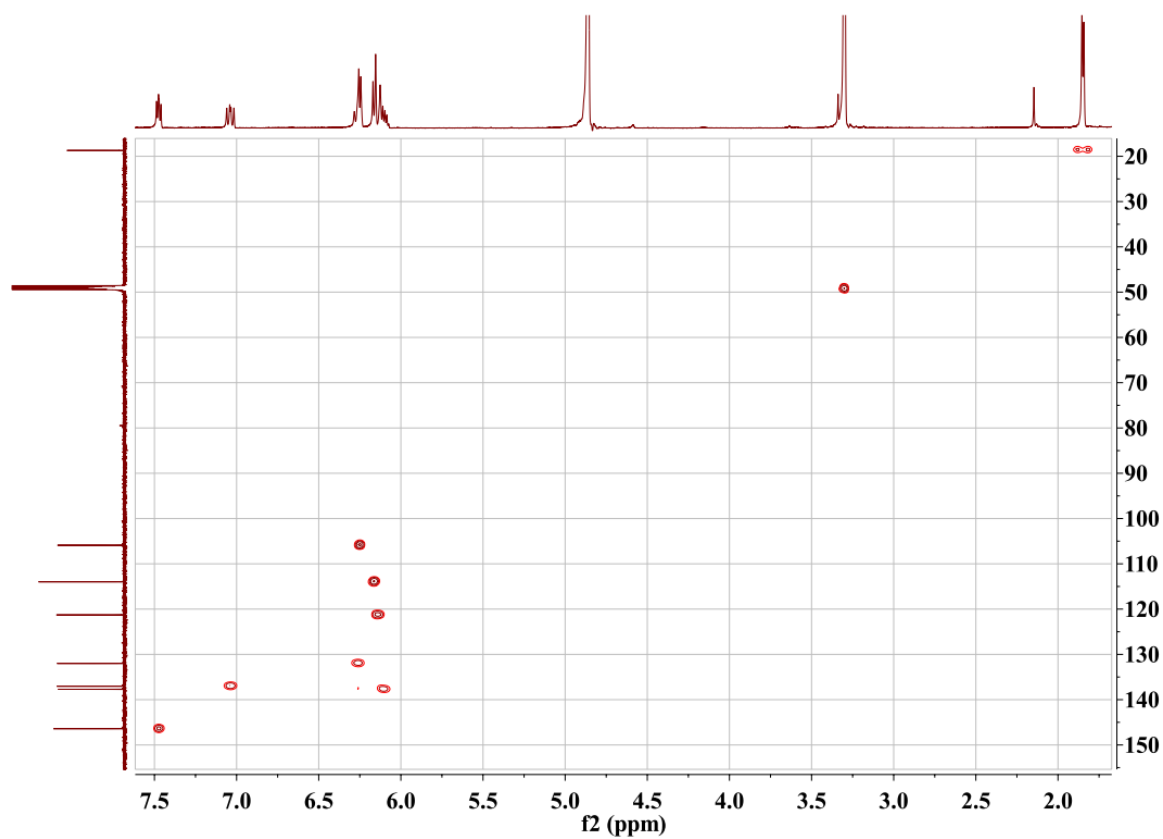

Figure S12. HSQC spectrum of **2** in methanol-*d*<sub>4</sub>

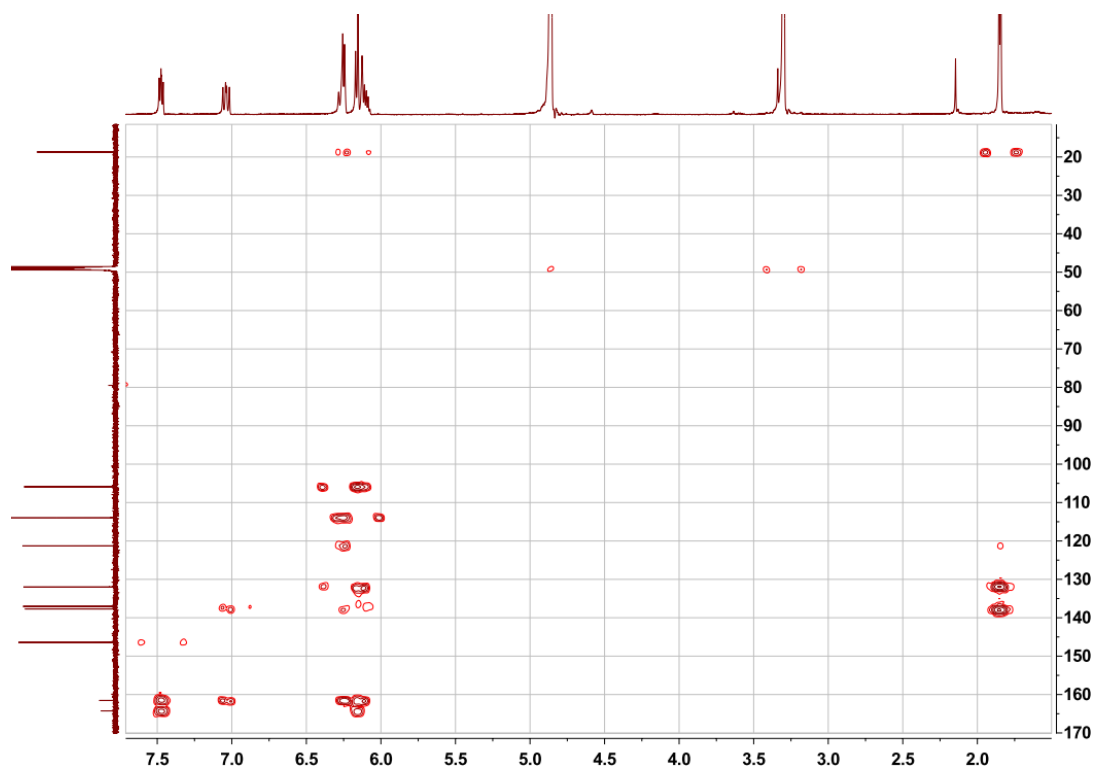

Figure S13. HMBC spectrum of **2** in methanol-*d*<sub>4</sub>

| Generic Display Report |                                             |  |                             |
|------------------------|---------------------------------------------|--|-----------------------------|
| Analysis Info          |                                             |  | Acquisition data:27/01/2019 |
| Analysis name:dylz-38  |                                             |  |                             |
| Method                 | esi_pos_50-1000_with calibration for 1min.m |  | operator: WHS               |
| Sample Name:           | Instrument: Agilent 6210 ESI/TOF MS         |  |                             |
| Comment                |                                             |  |                             |

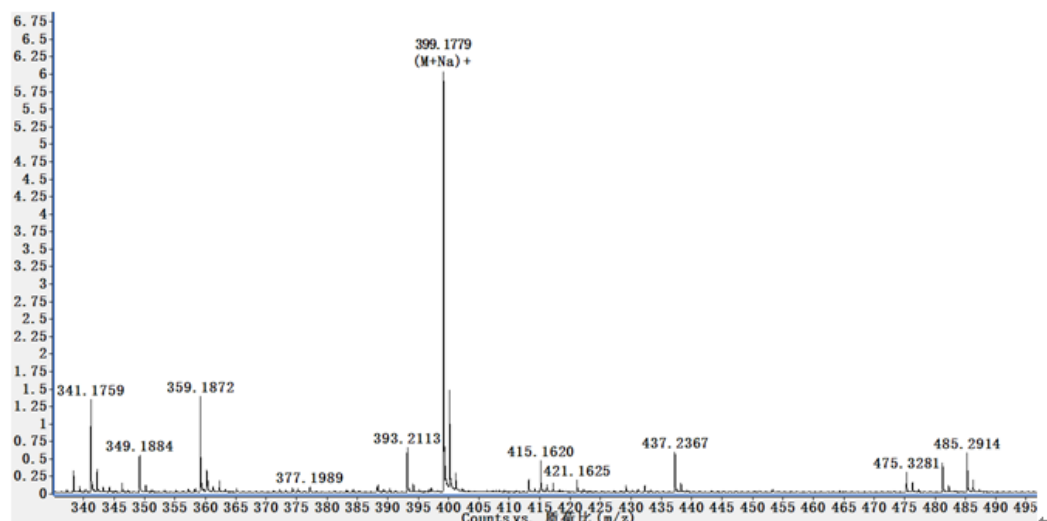

| Formula                                        | Cal. Mass (Na+) | Mass(Na+) | Err(ppm) |
|------------------------------------------------|-----------------|-----------|----------|
| C <sub>21</sub> H <sub>28</sub> O <sub>6</sub> | 399.1778        | 399.1779  | -0.24    |

Figure S14. HRESIMS of **3**

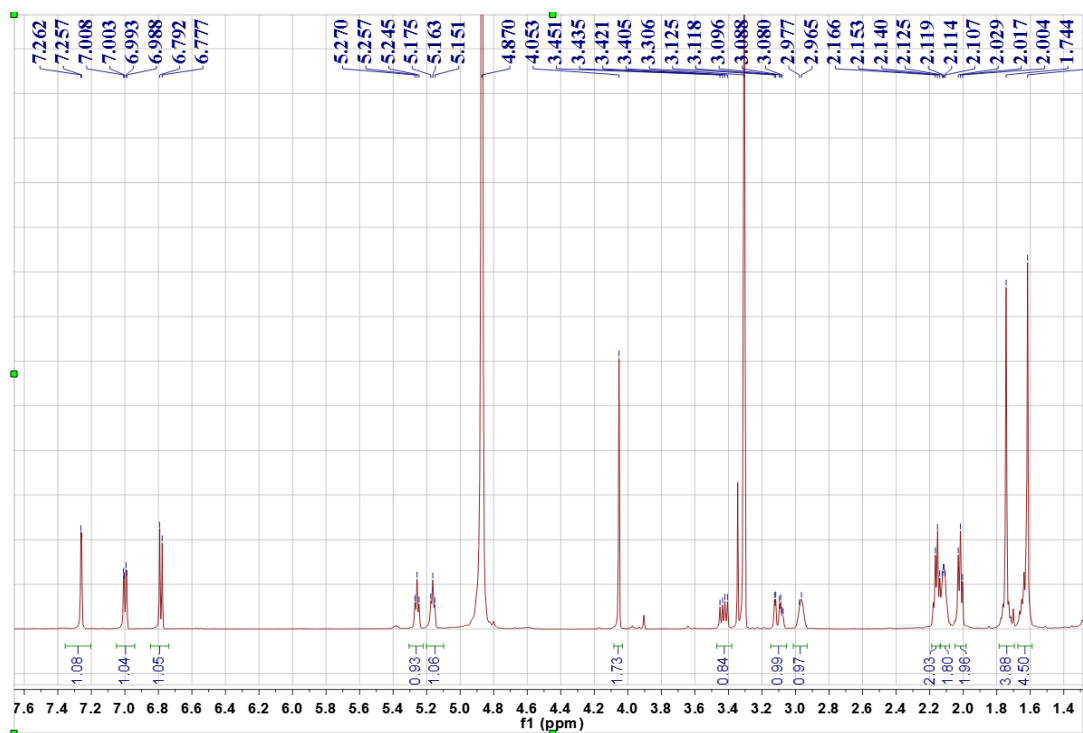

Figure S15. <sup>1</sup>H NMR spectrum of **3** in methanol-*d*<sub>4</sub>

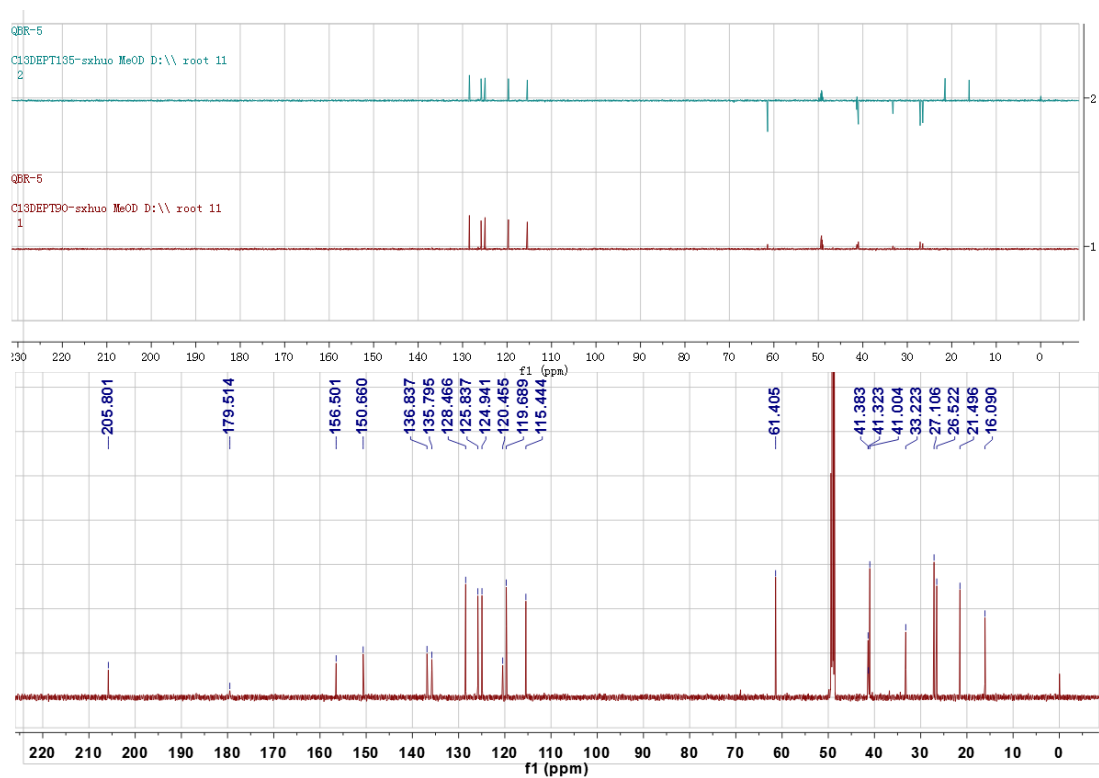

Figure S16.  $^{13}\text{C}$  NMR spectrum of **3** in methanol- $d_4$

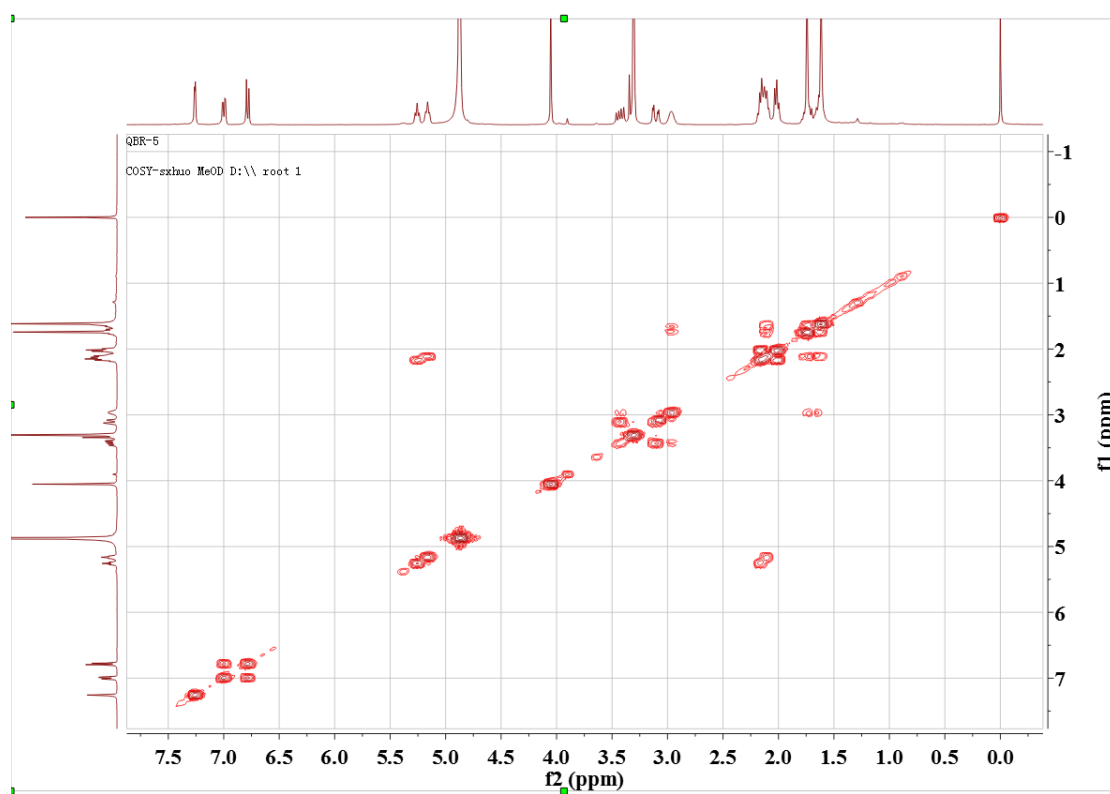

Figure S17.  $^1\text{H}$ - $^1\text{H}$  COSY spectrum of **3** in methanol- $d_4$

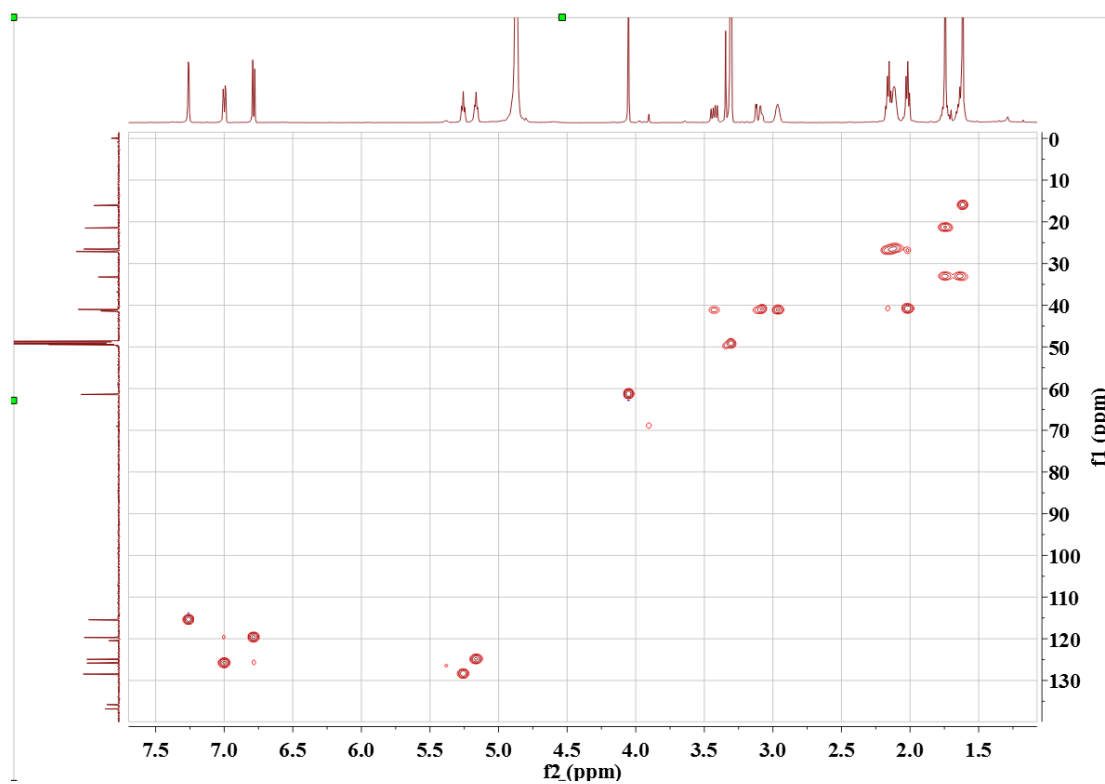

Figure S18. HSQC spectrum of **3** in methanol-*d*<sub>4</sub>

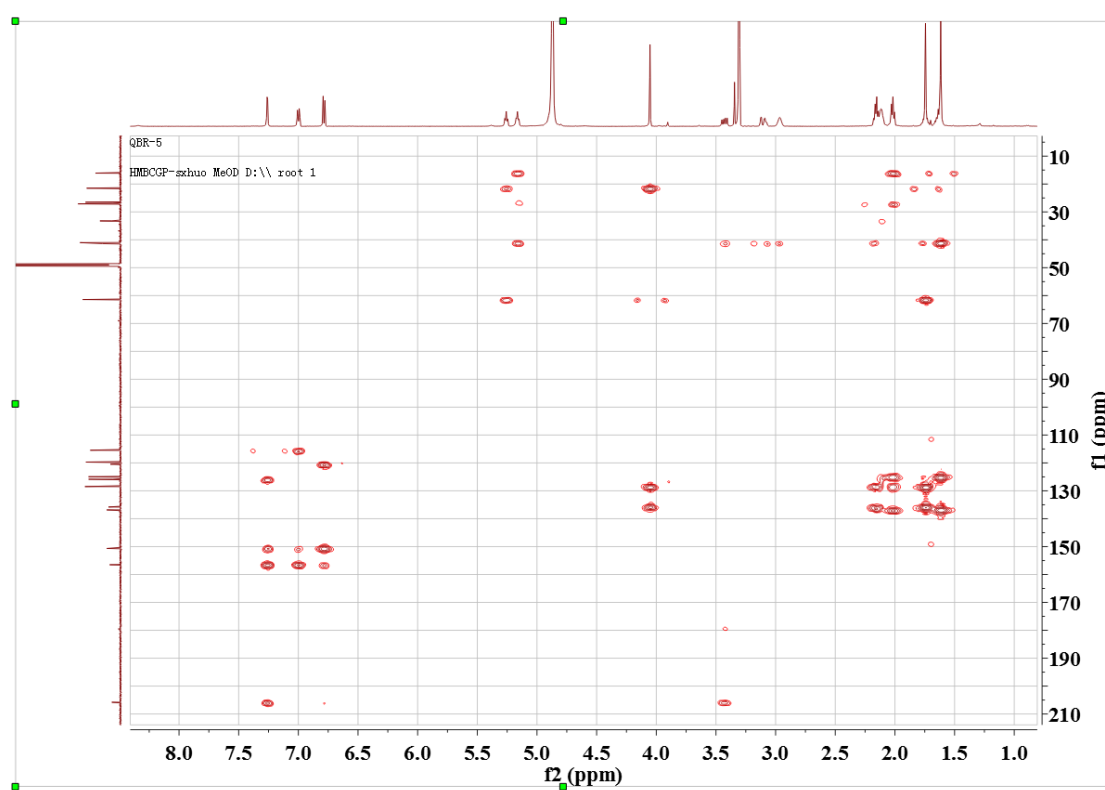

Figure S19. HMBC spectrum of **3** in methanol-*d*<sub>4</sub>

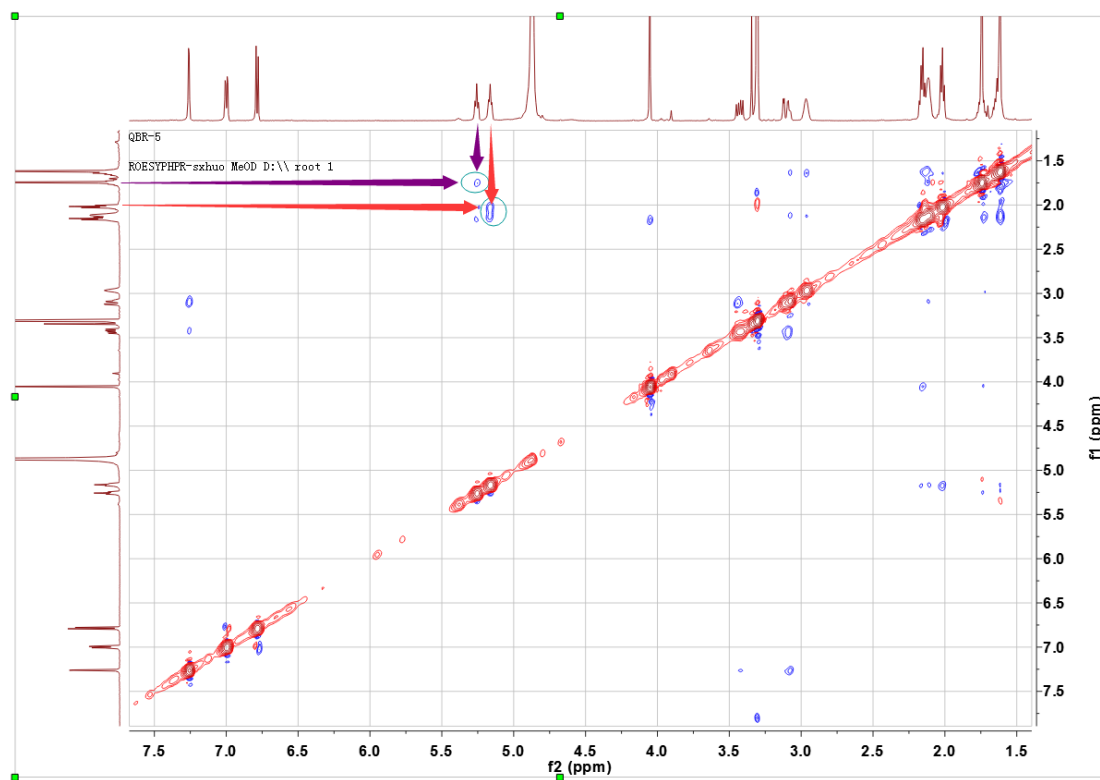

Figure S20. ROESY spectrum of **3** in methanol-*d*<sub>4</sub>

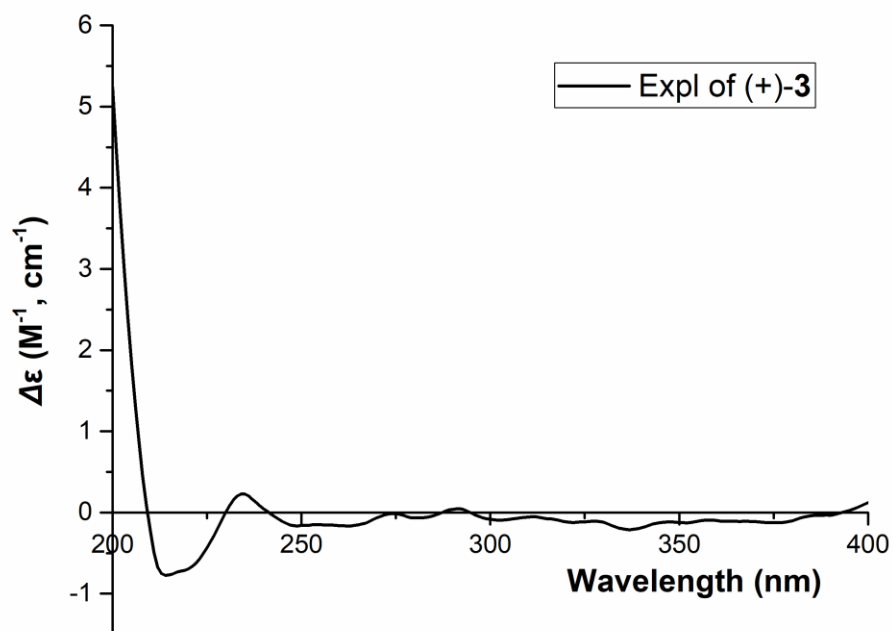

Figure S21. CD spectrum of **3** in methanol
